# Supplementary material for: Genomic Landscape of Uterine Sarcomas Defined Through Prospective Clinical Sequencing
Source: Oxford University Press journal article supplement (doi:10.1158/1078-0432.ccr-19-3959), 2020-04-16
Supplement: 10780432ccr193959-sup-233418_2_supp_6211627_q8dtvk.docx [file 10780432ccr193959-sup-233418_2_supp_6211627_q8dtvk.docx]

Supplemental Table 1

| **Patient** | **Gene1** | **Gene2** | **Assay** | **Relevance** |
| --- | --- | --- | --- | --- |
| 1 | BRAF Exon9 | BRAF Exon12 | MSK-Fusion | Likely Oncogenic |
| 2 | JAZF1 Exon3 | SUZ12 Exon2 | MSK-Fusion | Likely Oncogenic, Diagnostic of LG-ESS |
| 3 | LBH Exon2 | ALK Exon18 | MSK-Fusion | Likely Oncogenic |
| 4 | YWHAE Exon5 | NUTM2B Exon2 | MSK-Fusion | Diagnostic of HG-ESS |
| 5 | YWHAE Exon5 | NUTM2B Exon2 | MSK-Fusion | Diagnostic of HG-ESS |
| 6 | ZC3H7B | BCOR | MSK-IMPACT | Likely Oncogenic, Diagnostic of HG-ESS |

Legend:

LG-ESS: Low grade endometrial stromal sarcoma; HG-ESS: High grade endometrial stromal sarcoma; IMT: Inflammatory myofibroblastic tumor
